# Supplementary material for: Ionic liquids with polychloride anions as effective oxidants for the dissolution of UO2
Source: Royal Society of Chemistry journal article supplement (doi:10.1039/c9dt03574e), 2019-01-01
Supplement: c9dt03574e2.pdf [file c9dt03574e2.pdf]

## Electronic Supplementary Information

### Ionic liquids with polychloride anions as effective oxidants for the dissolution of $\text{UO}_2$

Aining Yao,<sup>a,b</sup> Feng Qu,<sup>a</sup> Yu Liu,<sup>a</sup> Guangyin Qu,<sup>a</sup> Hao Lin,<sup>a</sup> Shaowen Hu,<sup>a</sup> Xiangyun Wang<sup>a</sup> and Taiwei Chu<sup>\*a</sup>

<sup>a</sup> Radiochemistry and Radiation, Chemistry Key Laboratory of Fundamental Science, College of Chemistry and Molecular Engineering, Peking University, Beijing 100871, China.

<sup>b</sup> Sino-French Institute of Nuclear Engineering and Technology, Sun Yat-sen University, Zhuhai 519082, China.

\* Corresponding author: Taiwei Chu. E-mail: twchu@pku.edu.cn.

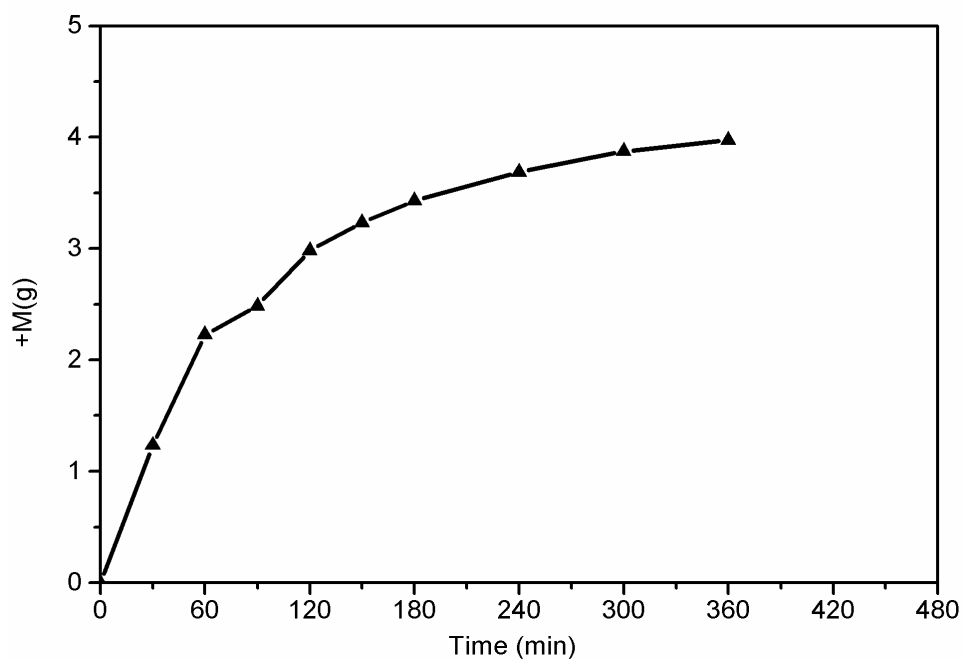

Fig. S1 Mass gain of [Pmim]Cl IL with the addition of chlorine gas as a function of time.

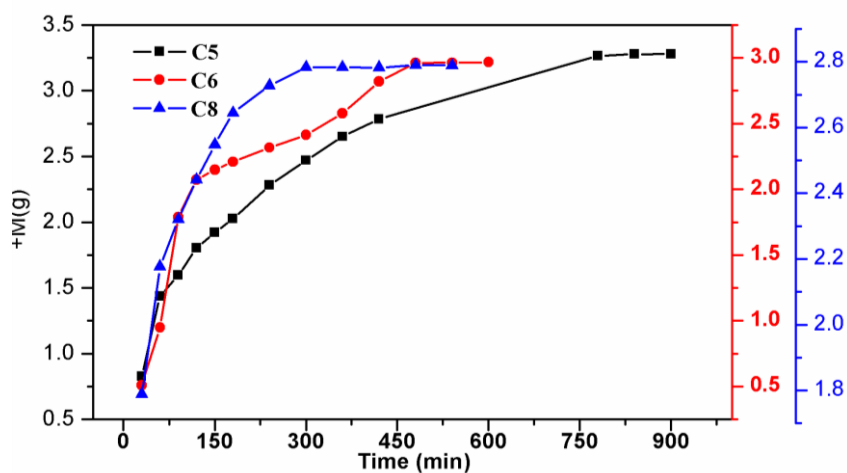

**Fig. S2** Mass gain of [Pnmim]Cl, [Hmim]Cl and [Omim]Cl IL with the addition of chlorine gas as a function of time (■ [Pnmim]Cl, ● [Hmim]Cl and ▲ [Omim]Cl).

**Table S1** The amount of Cl<sub>2</sub> uptake (mmol) after reaching equilibrium in the mixed ILs with different molar ratios of [Bmim]Cl versus [Bmim][Tf<sub>2</sub>N].

| molar ratio ([Bmim]Cl vs. [Bmim][Tf <sub>2</sub> N])           | 1 : 0 | 1 : 1 | 1 : 2 | 1 : 4 | 0 : 1 |
|----------------------------------------------------------------|-------|-------|-------|-------|-------|
| [Bmim]Cl (mmol)                                                | 17.17 | 5.05  | 2.96  | 1.62  | 0     |
| [Bmim][Tf <sub>2</sub> N] (mmol)                               | 0     | 5.05  | 5.92  | 6.48  | 7.15  |
| Cl <sub>2</sub> uptake (mmol)                                  | 31.05 | 7.54  | 4.92  | 3.35  | 1.14  |
| Cl <sub>2</sub> solubility in [Bmim][Tf <sub>2</sub> N] (mmol) | —     | 0.81  | 0.94  | 1.03  | 1.14  |
| molar ratio of [Cl] <sub>Cl</sub> /[Bmim]Cl                    | 4.62  | 3.67  | 3.68  | 3.85  | 0     |
| molar ratio of [Cl] <sub>T</sub> /[Bmim]Cl                     | 4.62  | 3.99  | 4.32  | 5.13  | —     |

[Cl]<sub>T</sub> means, the mole amount of Cl resulting from all the amount of chlorine gas absorbed by the IL mixture and [Bmim]Cl. [Cl]<sub>Cl</sub> means, the mole amount of Cl resulting from Cl<sub>2</sub> soluble in [Bmim]Cl (all the amount of chlorine gas absorbed by the IL mixture, subtracts, that from a part of Cl<sub>2</sub> soluble in [Bmim][Tf<sub>2</sub>N]) and [Bmim]Cl.

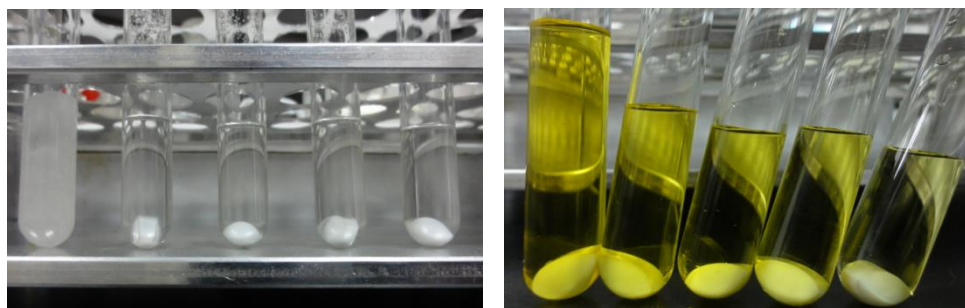

**Fig. S3** Different molar ratio mixed ILs of [Bmim]Cl and [Bmim][Tf<sub>2</sub>N] (1 : 0, 1 : 1, 1 : 2, 1 : 4 and 0 : 1 from left to right) before and after adding Cl<sub>2</sub>.

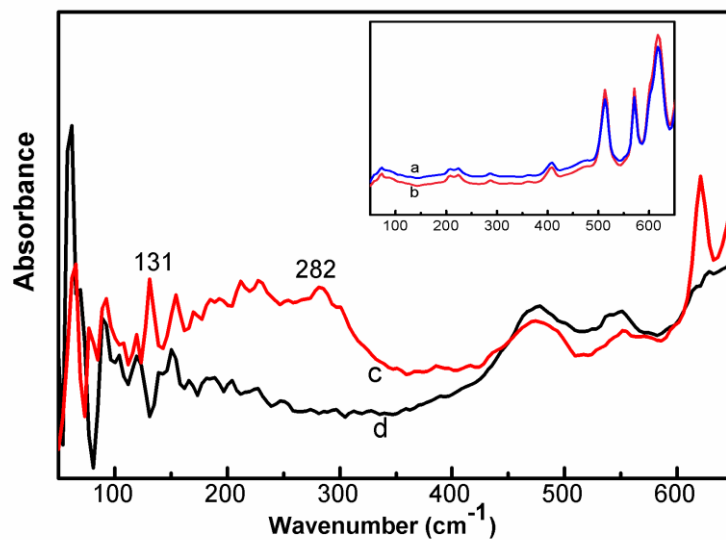

**Fig. S4** IR spectra of (a) [Bmim][Tf<sub>2</sub>N], (b) passing Cl<sub>2</sub> into [Bmim][Tf<sub>2</sub>N] for one hour, (c) passing Cl<sub>2</sub> into [Bmim]Cl for one hour, and (d) [Bmim]Cl.

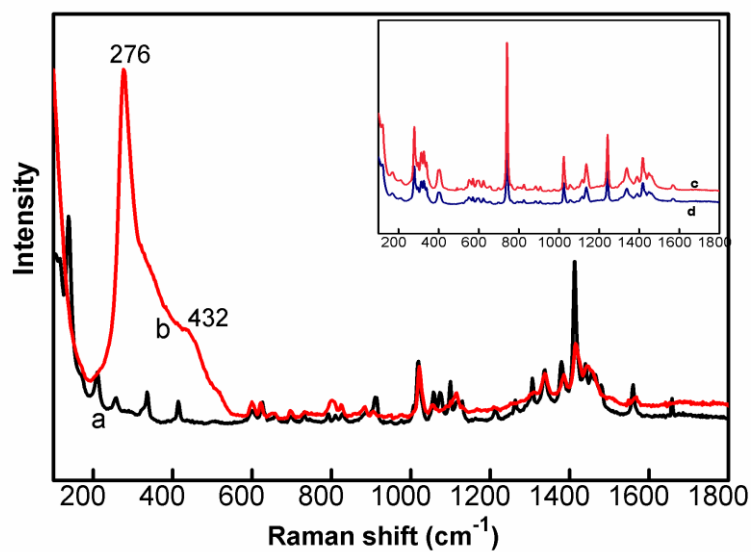

**Fig. S5** Raman spectra of (a) [Bmim]Cl, (b) passing Cl<sub>2</sub> into [Bmim]Cl for one hour, (c) [Bmim][Tf<sub>2</sub>N] and (d) passing Cl<sub>2</sub> into [Bmim][Tf<sub>2</sub>N] for one hour.

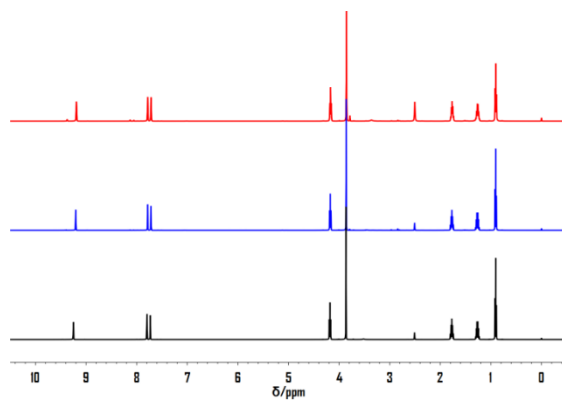

Fig. S6  $^1\text{H}$  NMR spectra of: the crystal obtained, the  $\text{UO}_2$  reaction solution and the pure unreacted ionic liquid mixtures (from top to bottom).

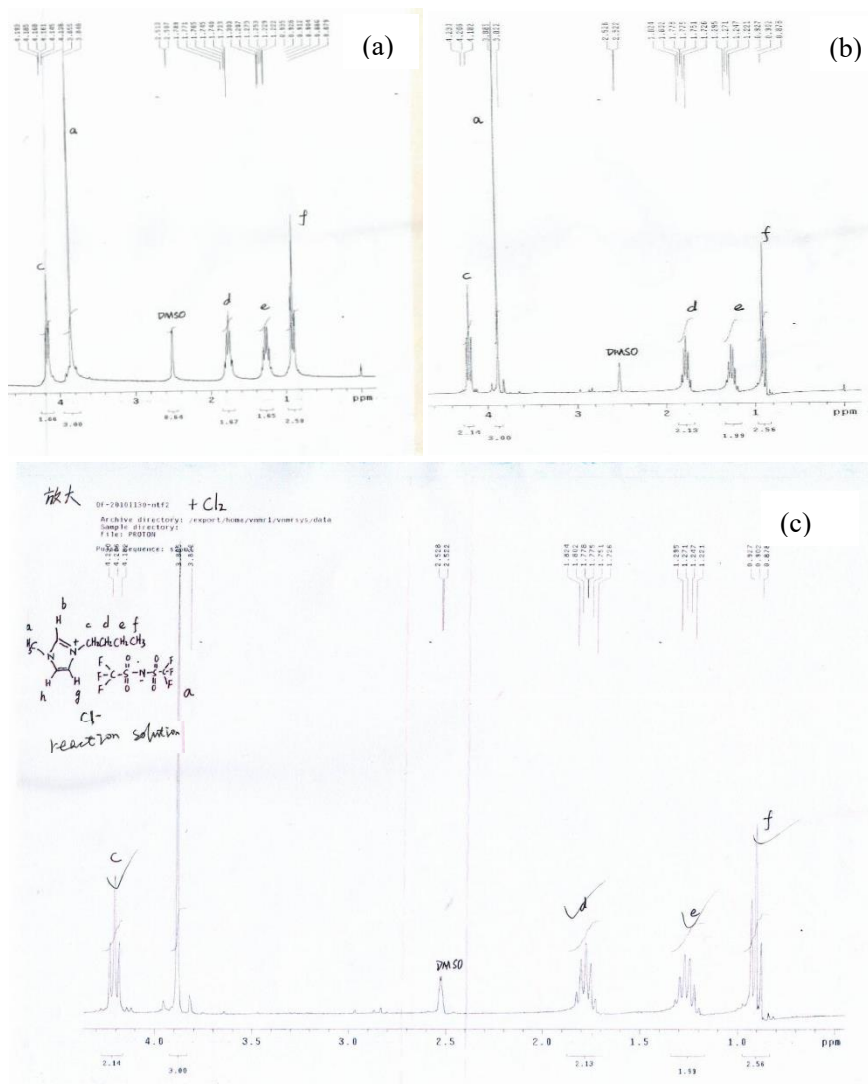

Fig. S7  $^1\text{H}$  NMR spectra of: (a) the unreacted ionic liquid mixtures, (b) the  $\text{UO}_2$  reaction solution after bubbling chlorine gas, and (c) the expanded NMR spectra of (b).

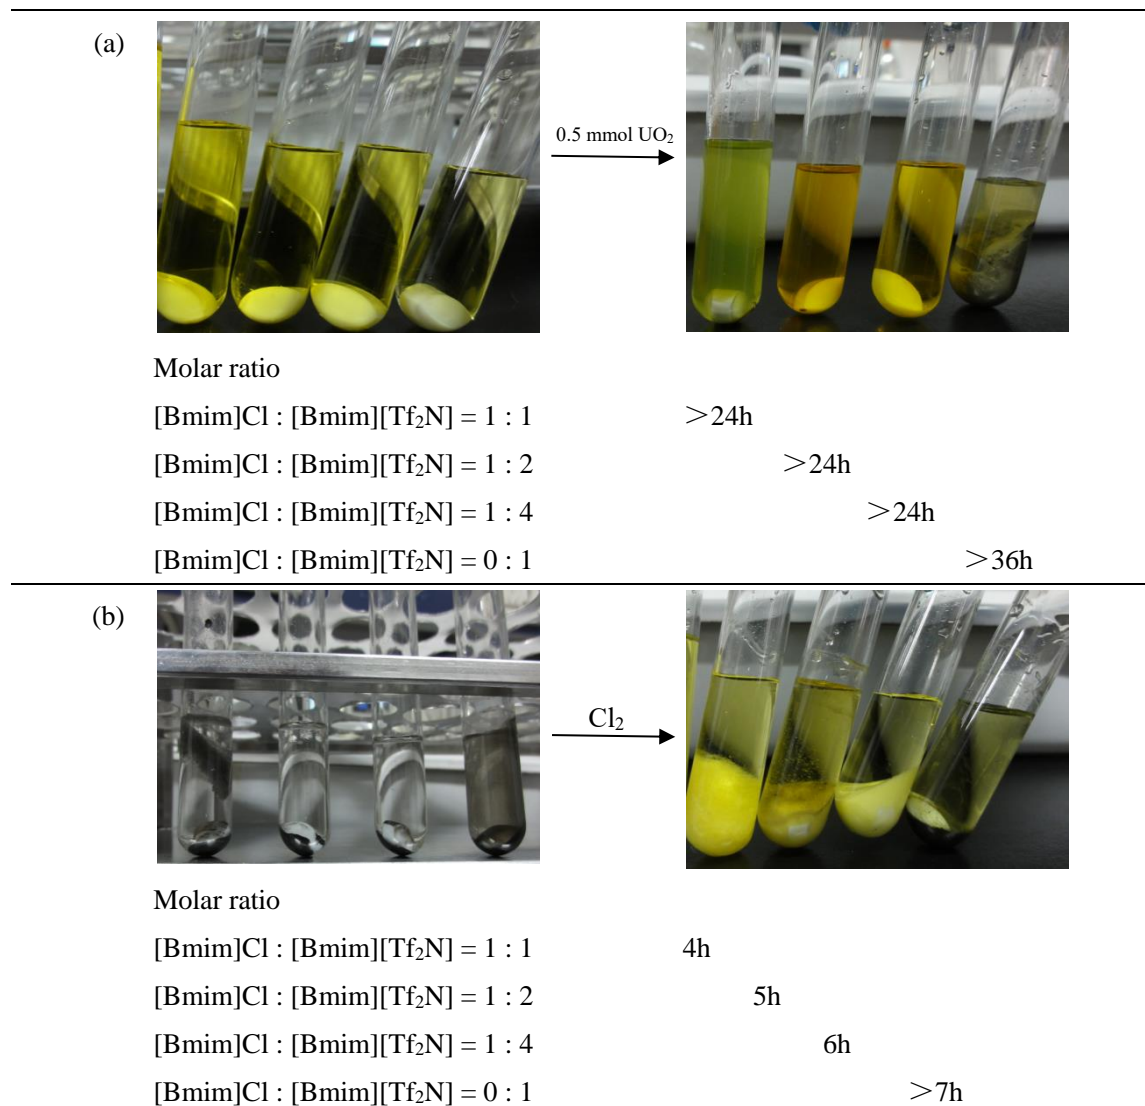

**Fig. S8** Photograph of the 0.5 mmol of  $\text{UO}_2$  dissolution in the mixed ILs using two different methods at a certain time (a, adding  $\text{UO}_2$  into the synthesized polychloride ILs, and b, adding  $\text{Cl}_2$  into the  $\text{UO}_2$  reaction mixture filled with  $[\text{Bmim}]\text{Cl}$  and  $[\text{Bmim}][\text{Tf}_2\text{N}]$ ).

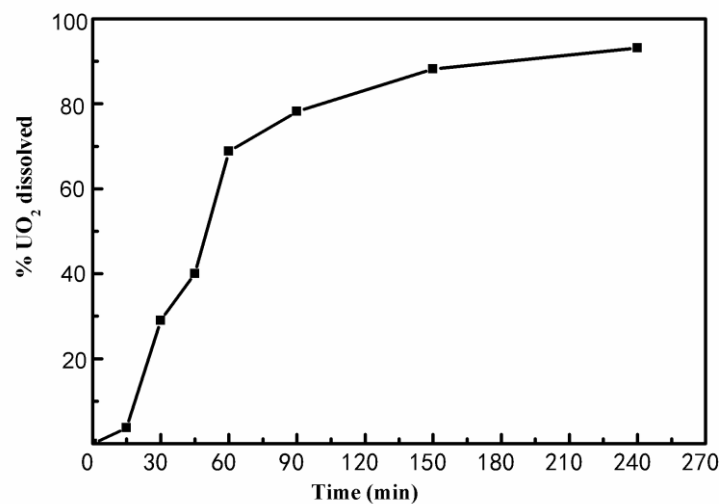

**Fig. S9** % UO<sub>2</sub> dissolved in the mixed IL of [Bmim]Cl and [Bmim][Tf<sub>2</sub>N] at room temperature as a function of duration Cl<sub>2</sub> time (0.3 mmol UO<sub>2</sub>, 1.28 mmol [Bmim]Cl and 3.5 mmol [Bmim][Tf<sub>2</sub>N]).

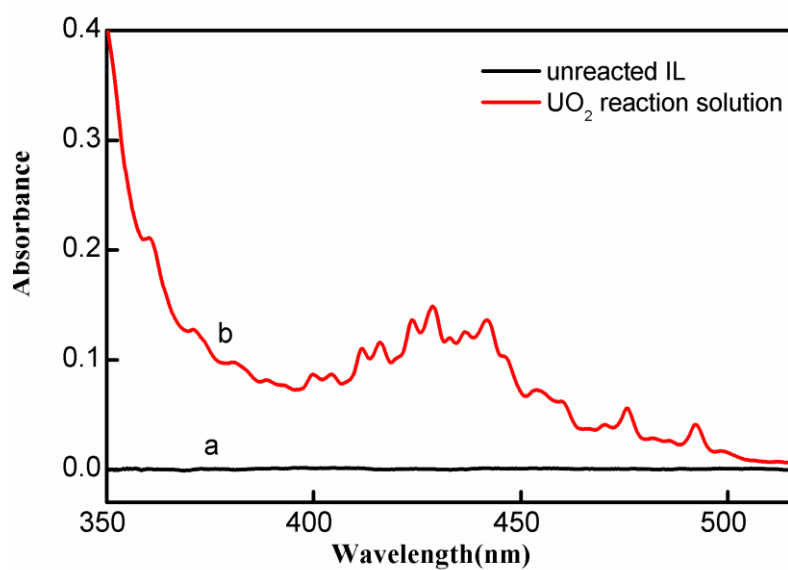

**Fig. S10** UV-visible absorption spectra for (a) the unreacted IL mixture, and (b) UO<sub>2</sub> reaction solution in the mixed IL.

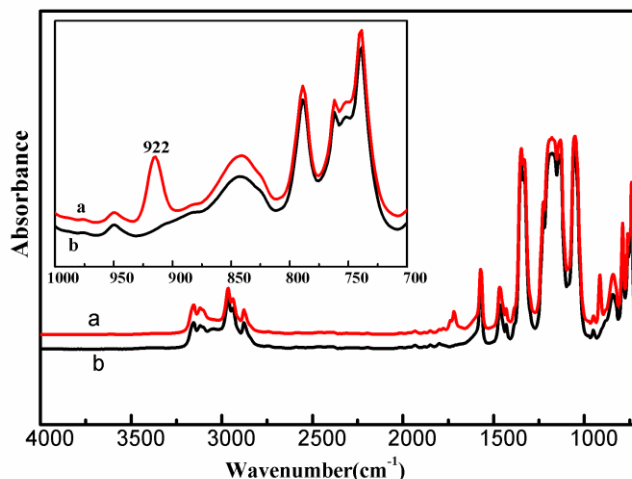

**Fig. S11** ATR-IR spectra for (a)  $\text{UO}_2$  reaction solution in the mixed IL, and (b) the unreacted IL mixture.

#### The water effect for the dissolution of $\text{Gd}_2\text{O}_3$ in the mixture of $[\text{Bmim}]\text{Cl}$ and $[\text{Bmim}][\text{Tf}_2\text{N}]$

Gadolinium(III) oxide (0.395 g) was separately added to the system from A to C (Table S2) at room temperature for two hours by bubbling dry chlorine gas into the reaction system, and  $\text{H}_2\text{O}$  in Table S2 means the artificial additional ultrapure water. Before the experiments, all the ILs were kept in a vacuum drying oven at  $70\text{ }^\circ\text{C}$  for 24 h. The solution was centrifuged (5500 rpm, 5 min), the liquid was decanted, and 0.3 mL of the liquid was taken out and analyzed for its metal content by ICP-AES.

**Table S2** The dissolution of  $\text{Gd}_2\text{O}_3$  in the system of  $[\text{Bmim}]\text{Cl}$  and  $[\text{Bmim}][\text{Tf}_2\text{N}]$  (3 g, molar ratio:1/2).

| System ID | Component                                                                        | dissolved $\text{Gd}_2\text{O}_3/\text{mg}$ |
|-----------|----------------------------------------------------------------------------------|---------------------------------------------|
| A         | 0.517g $[\text{Bmim}]\text{Cl}$ ,<br>2.48 g $[\text{Bmim}][\text{Tf}_2\text{N}]$ | 0.78                                        |
| B         | A + 0.022g $\text{H}_2\text{O}$                                                  | 29.8                                        |
| C         | A + 0.171g $\text{H}_2\text{O}$                                                  | 121.5                                       |

It could be found that almost 0.78 mg  $\text{Gd}_2\text{O}_3$  dissolved in the system A, and the water amounted to 1670 ppm after the dissolution experiment. The dissolution amount of  $\text{Gd}_2\text{O}_3$  increased with the artificial water addition into the reaction system, 29.8 mg in system B and 121.5 mg in system C. It suggested that water made the chlorine gas into  $\text{HCl}$  and  $\text{HClO}$  acid, thus producing reactive protons and leading to the

dissolution of Gd<sub>2</sub>O<sub>3</sub>. It has been reported that the availability of reactive protons is essential for the dissolution of metal oxides in ionic liquids.<sup>1-4</sup>

**Table S3** Crystallographic data for [Bmim]<sub>2</sub>[UO<sub>2</sub>Cl<sub>4</sub>].

| Compound                                                                                              | [Bmim] <sub>2</sub> [UO <sub>2</sub> Cl <sub>4</sub> ]                          |
|-------------------------------------------------------------------------------------------------------|---------------------------------------------------------------------------------|
| Chemical formula                                                                                      | C <sub>16</sub> H <sub>30</sub> Cl <sub>4</sub> N <sub>4</sub> O <sub>2</sub> U |
| <i>T</i> (K)                                                                                          | 293(2)                                                                          |
| Formula weight                                                                                        | 690.27                                                                          |
| Crystal system                                                                                        | monoclinic                                                                      |
| Space group                                                                                           | <i>P</i> 2 <sub>1</sub> / <i>c</i> (No. 14)                                     |
| <i>a</i> , Å                                                                                          | 8.5021(2)                                                                       |
| <i>b</i> , Å                                                                                          | 17.4789(3)                                                                      |
| <i>c</i> , Å                                                                                          | 10.3866(2)                                                                      |
| <i>β</i> , deg                                                                                        | 125.2340(10)                                                                    |
| <i>V</i> , Å <sup>3</sup>                                                                             | 1260.75(4)                                                                      |
| <i>Z</i>                                                                                              | 2                                                                               |
| <i>D<sub>c</sub></i> , g/cm <sup>3</sup>                                                              | 1.818                                                                           |
| <i>μ</i> (Mo Kα), mm <sup>-1</sup>                                                                    | 6.878                                                                           |
| <i>F</i> (000)                                                                                        | 660                                                                             |
| Crystal size, mm <sup>3</sup>                                                                         | 0.20 × 0.18 × 0.05                                                              |
| <i>T</i> <sub>min</sub> , <i>T</i> <sub>max</sub>                                                     | 0.316, 0.721                                                                    |
| <i>θ</i> <sub>min</sub> , <i>θ</i> <sub>max</sub> , deg                                               | 3.42, 27.50                                                                     |
| no. total reflns.                                                                                     | 18214                                                                           |
| no. uniq. reflns. ( <i>R</i> <sub>int</sub> )                                                         | 2895 (0.0473)                                                                   |
| no. obs. [ <i>I</i> ≥ 2σ( <i>I</i> )]                                                                 | 1967                                                                            |
| no. params                                                                                            | 124                                                                             |
| <i>R</i> <sub>1</sub> , <sup>a</sup> <i>wR</i> <sub>2</sub> <sup>b</sup> [ <i>I</i> ≥ 2σ( <i>I</i> )] | 0.0247, 0.0577                                                                  |
| <i>R</i> <sub>1</sub> , <sup>a</sup> <i>wR</i> <sub>2</sub> <sup>b</sup> (all data)                   | 0.0474, 0.0623                                                                  |
| GOF                                                                                                   | 0.988                                                                           |
| Δρ, e/Å <sup>3c</sup>                                                                                 | 0.420, -0.826                                                                   |
| max. and mean Δ/σ <sup>d</sup>                                                                        | 0.000, 0.000                                                                    |

<sup>a</sup>*R*<sub>1</sub> = Σ||*F*<sub>o</sub>| - |*F*<sub>c</sub>||/Σ|*F*<sub>o</sub>|. <sup>b</sup>*wR*<sub>2</sub> = [Σ*w*(*F*<sub>o</sub><sup>2</sup> - *F*<sub>c</sub><sup>2</sup>)<sup>2</sup>]/Σ*w*(*F*<sub>o</sub><sup>2</sup>)<sup>2</sup>]<sup>1/2</sup>. <sup>c</sup>Maximum and minimum residual electron density. <sup>d</sup>Maximum and mean shift/sigma.



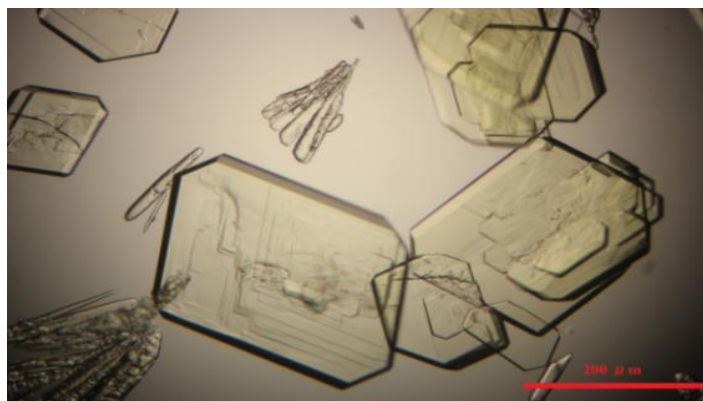

**Fig. S12** The polarizing optical microscopy photos of [Bmim]<sub>2</sub>[UO<sub>2</sub>Cl<sub>4</sub>].

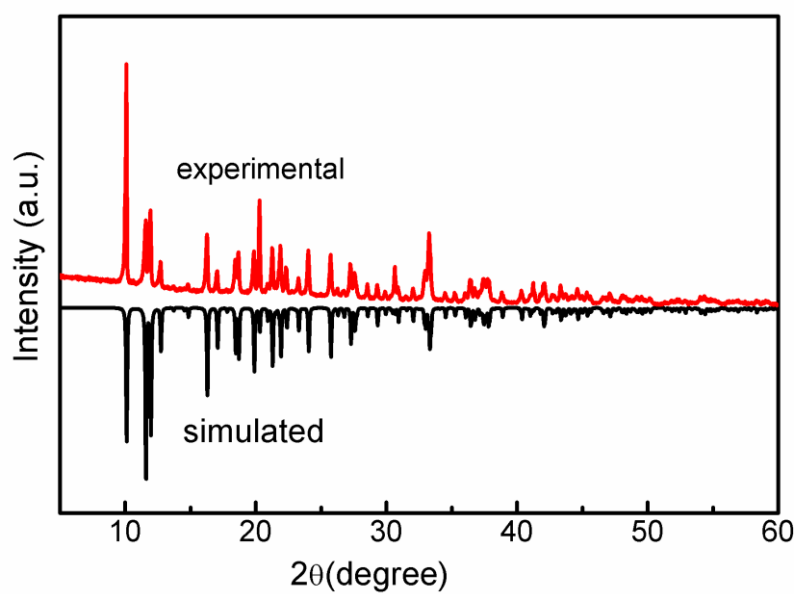

**Fig. S13** Experimental (red) and simulated (black) PXRD patterns of [Bmim]<sub>2</sub>[UO<sub>2</sub>Cl<sub>4</sub>].

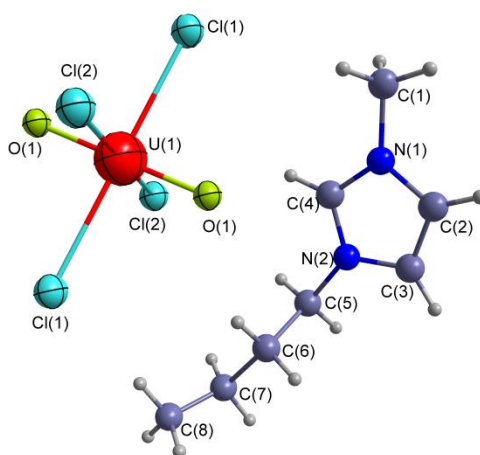

**Fig. S14** ORTEP drawing of the [Bmim]<sup>+</sup> cation and the [UO<sub>2</sub>Cl<sub>4</sub>]<sup>2-</sup> anion. Displacement ellipsoids are drawn at the 50% probability level and H atoms are represented by circles of arbitrary size.

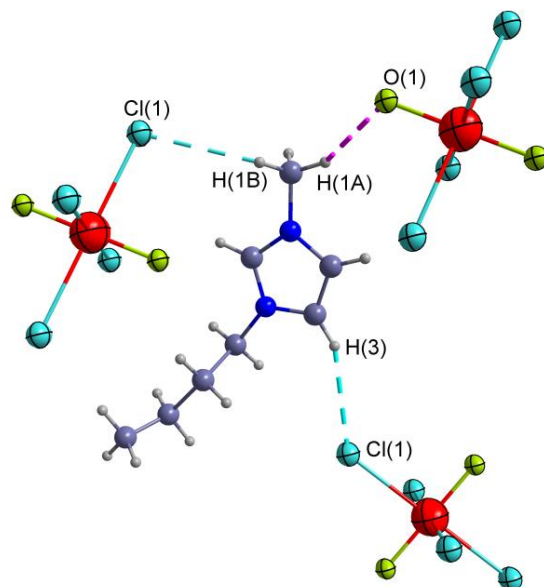

**Fig. S15** Representation of C-H...O and C-H...Cl interactions in the solid compound  
[Bmim]<sub>2</sub>[UO<sub>2</sub>Cl<sub>4</sub>].

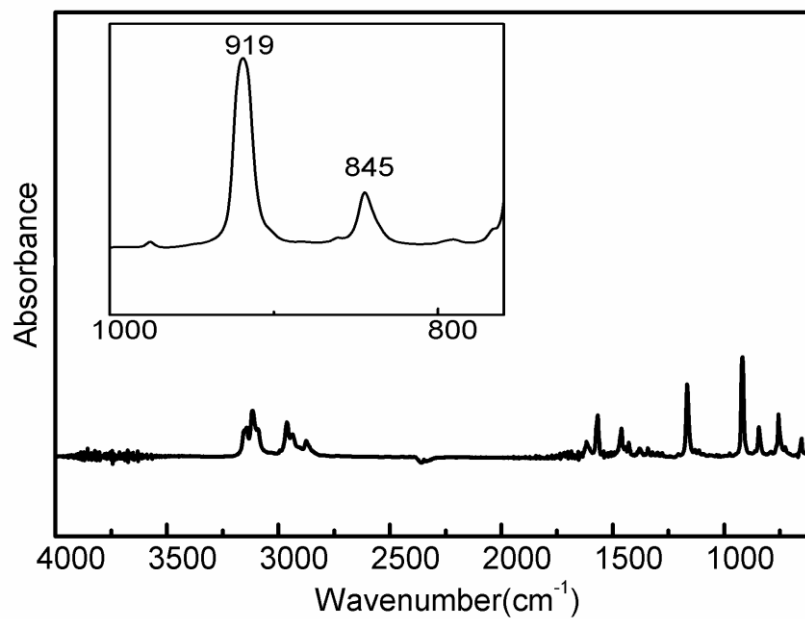

**Fig. S16** IR spectra of the U-crystal obtained from the dissolved IL mixture at room temperature.

**Reference:**

- [1] I. Billard, C. Gaillard and C. Hennig, *Dalton Trans.*, 2007, 4214-4221.

- [2] P. Nockemann, B. Thijs, S. Pittois, J. Thoen, C. Glorieux, K. Van Hecke, L. Van Meervelt, B. Kirchner and K. Binnemans, *J. Phys. Chem. B*, 2006, **110**, 20978-20992.
- [3] P. Nockemann, R. Van Deun, B. Thijs, D. Huys, E. Vanecht, K. Van Hecke, L. Van Meervelt and K. Binnemans, *Inorg. Chem.*, 2010, **49**, 3351-3360.
- [4] S. Wellens, T. Vander Hoogerstraete, C. Möller, B. Thijs, J. Luyten and K. Binnemans, *Hydrometallurgy*, 2014, **114**, 27-33.
